# Supplementary material
Source: Elsevier journal article supplement (https://www.sciencedirect.com/science/article/pii/S0034935621001018)
Supplement: mmc1 [file S0034935621001018:mmc1.doc]

**MATERIAL ANEXO/Suplementario(S):**

**Figura 1S: *Estados férricos***

***IST: índice de saturación de transferrina; PCR: proteína C reactiva;***

***Tabla 1S*: Prevalencia de la anemia según distintos umbrales (IC95%)**

| **Variable** | **Anemia OMS** | **Hb: 13-14g/dL** | **Hb: <13g/dL** |
| --- | --- | --- | --- |
| Total | 6.6% (4.6, 9.1) | 20.4% (17.1, 24.2) | 14.5% (11.4, 17.5) |
| Hombres | 6.8% (4.2, 10.7) | 19.2% (14.7, 24.7) | 6.8% (4.2, 10.7) |
| Mujeres | 6.3% (3.7, 10.2) | 22.4% (17.5, 28.1) | 22.4% (17.5, 28.1) |
| PTC | 4.7% (2.3, 8.9) | 17.1% (12.2, 23.3) | 9.8% (5.6, 14.1) |
| PTR | 7.5% (4.9, 11.3) | 22.3% (17.8, 27.5) | 16.7% (12.5, 20.9) |

**PTC: Prótesis Total de Cadera; PTR: Prótesis Total de Rodilla; IC95%: Intervalo de Confianza al 95%; OMS: Organización Mundial de la Salud**

***Gráfica 1S:* Capacidad discriminativa de Hb, VCM, HCM y ADE para Déficit de hierro (Ferritina <30ng/mL)**

| **Variable** | **AUC (IC95%)** |
| --- | --- |
| Hb | 0.729 (0.673, 0.784) |
| VCM | 0.764 (0.708, 0.820) |
| HCM | 0.780 (0.726, 0.835) |
| ADE | 0.715 (0.651, 0.780) |
